# Supplementary material for: Nuclear quantum effect and H/D isotope effect on Cl· + (H2O)n→ HCl + OH·(H2O)n−1(n= 1–3) reactions
Source: Royal Society of Chemistry journal article supplement (doi:10.1039/c8ra02679c), 2018-01-01
Supplement: c8ra02679c1.pdf [file c8ra02679c1.pdf]

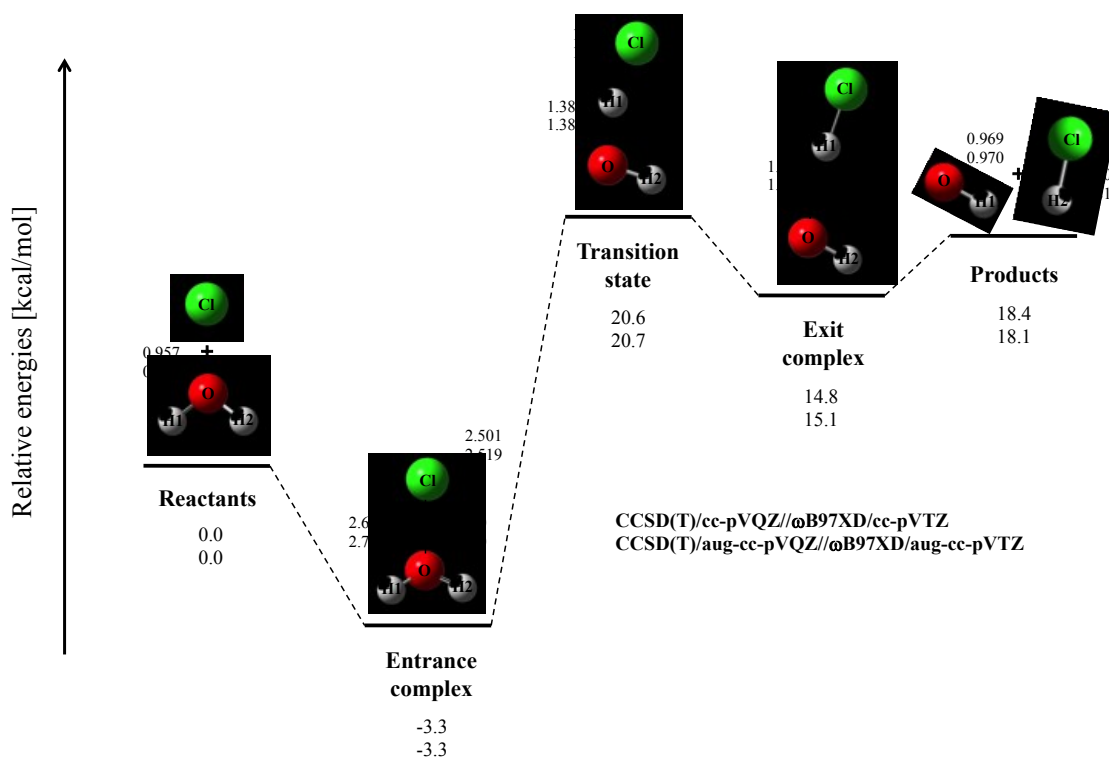

FIGURE S1. The energy profile [kcal/mol] and geometrical parameters for  $\text{Cl}\cdot + \text{H}_2\text{O} \rightarrow \text{HCl} + \text{OH}\cdot$  reaction obtained by CCSD(T)/cc-pVQZ// $\omega$ B97XD/cc-pVTZ and CCSD(T)/aug-cc-pVQZ// $\omega$ B97XD/aug-cc-pVTZ calculations.

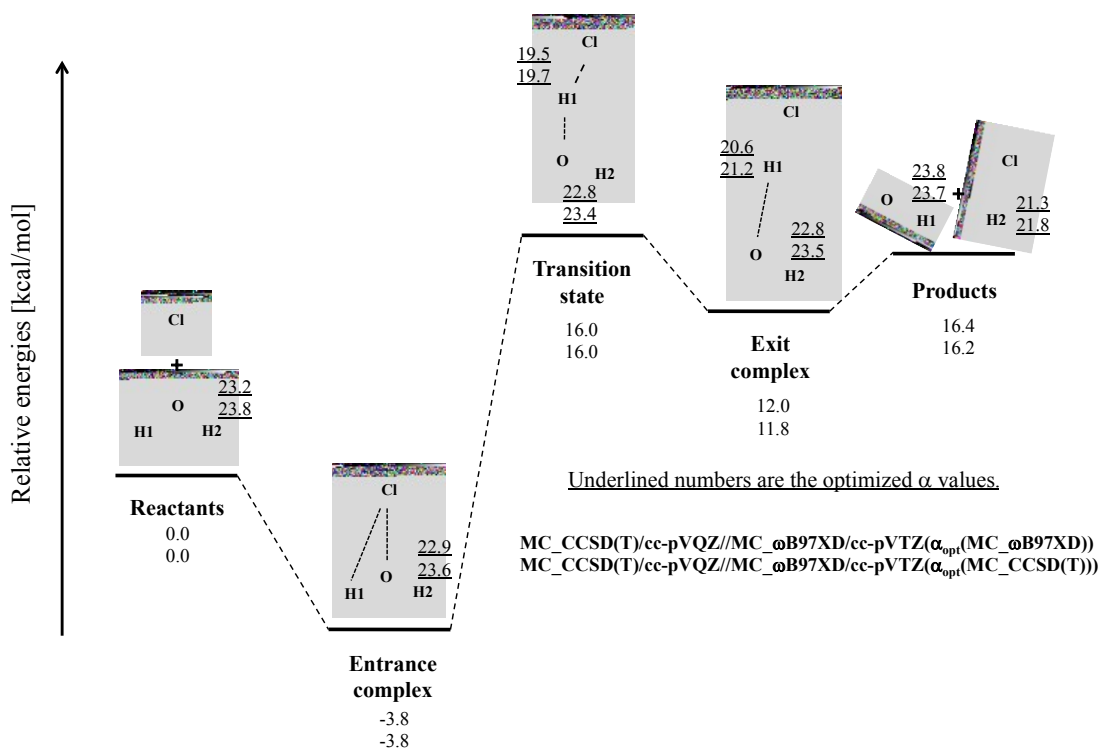

FIGURE S2. The potential energy profile [kcal/mol] for  $\text{Cl}\cdot + \text{H}_2\text{O} \rightarrow \text{HCl} + \text{OH}\cdot$  reaction by MC\_CCSD(T)/cc-pVQZ/MC\_ωB97XD/cc-pVTZ calculations with the optimized  $\alpha_{\text{opt}}$  values by MC\_ωB97XD/MC\_cc-pVQZ/MC\_ωB97XD/cc-pVTZ( $\alpha_{\text{opt}}(\text{MC}_\omega\text{B97XD})$ ) and MC\_CCSD(T)/cc-pVQZ/MC\_ωB97XD/cc-pVTZ( $\alpha_{\text{opt}}(\text{MC\_CCSD(T)})$ ) calculations.

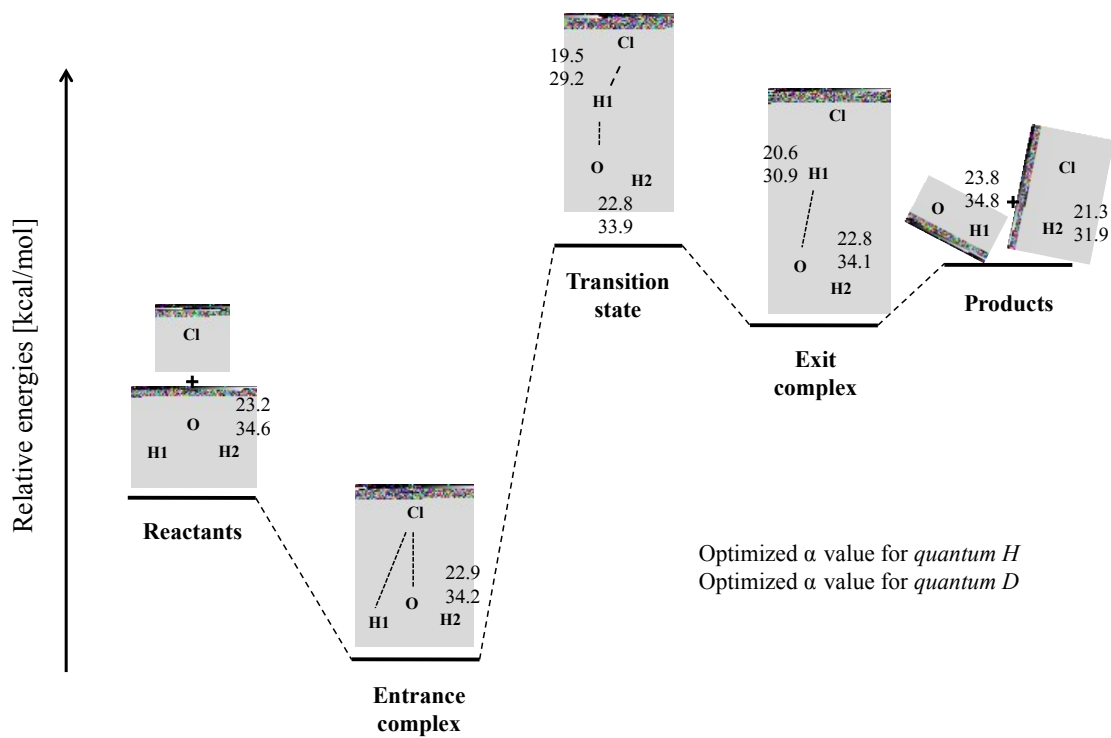

FIGURE S3. The exponent  $\alpha_{\text{opt}}$  value of nuclear basis function obtained by MC $\omega$ B97XD/cc-pVQZ//MC $\omega$ B97XD/cc-pVTZ calculation for  $\text{Cl}\cdot + \text{H}_2\text{O} \rightarrow \text{HCl} + \text{OH}\cdot$  and  $\text{Cl}\cdot + \text{D}_2\text{O} \rightarrow \text{DCl} + \text{OD}\cdot$  reaction.

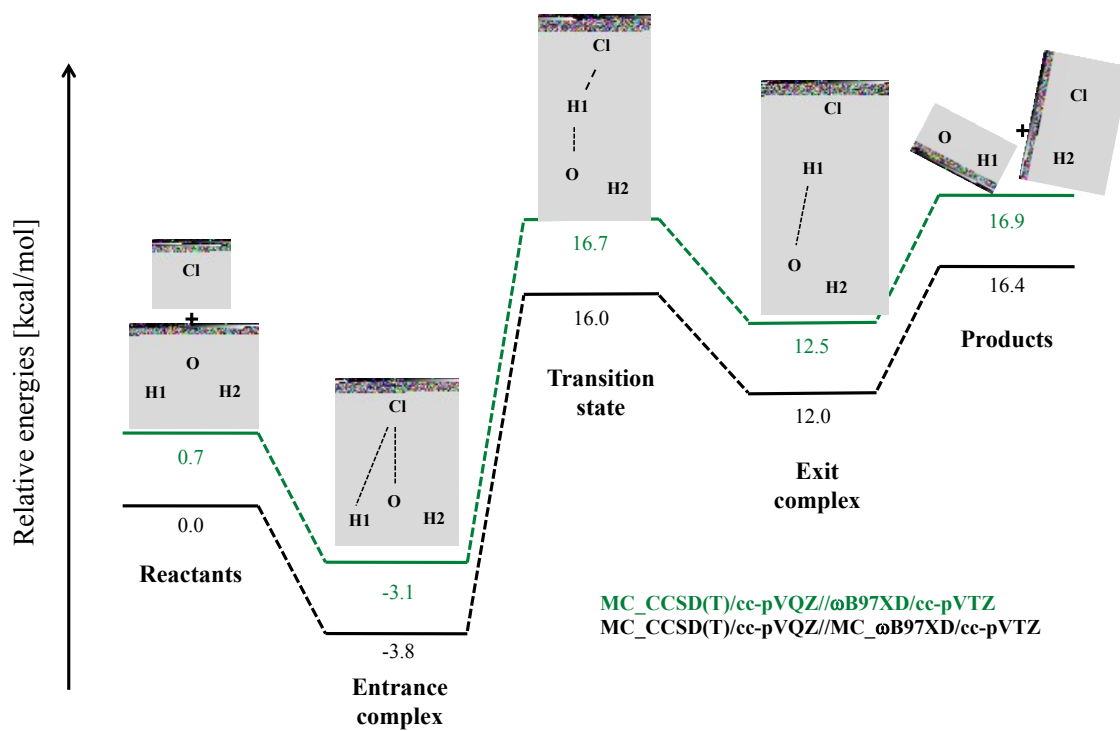

FIGURE S4. The potential energy profile [kcal/mol] for  $\text{Cl}\cdot + \text{H}_2\text{O} \rightarrow \text{HCl} + \text{OH}\cdot$  reaction obtained by  $\text{MC\_CCSD(T)/cc-pVQZ//}\omega\text{B97XD/cc-pVTZ}$  and  $\text{MC\_CCSD(T)/cc-pVQZ//MC}_\omega\text{B97XD/cc-pVTZ}$  methods.

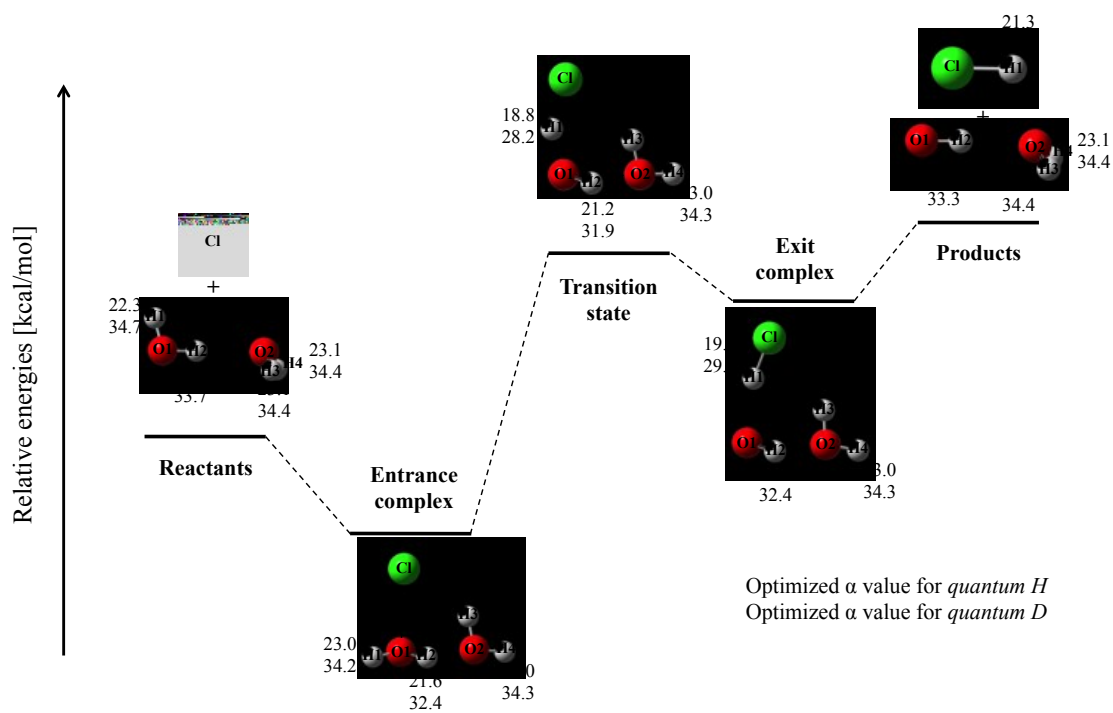

FIGURE S5. The exponent  $\alpha_{\text{opt}}$  value of nuclear basis function obtained by MC\_ωB97XD.cc-pVQZ//MC\_ωB97XD/cc-pVTZ calculation for  $\text{Cl}\cdot + (\text{H}_2\text{O})_2 \rightarrow \text{HCl} + \text{OH}\cdot(\text{H}_2\text{O})$  and  $\text{Cl}\cdot + (\text{D}_2\text{O})_2 \rightarrow \text{DCl} + \text{OD}\cdot(\text{D}_2\text{O})$  reaction.

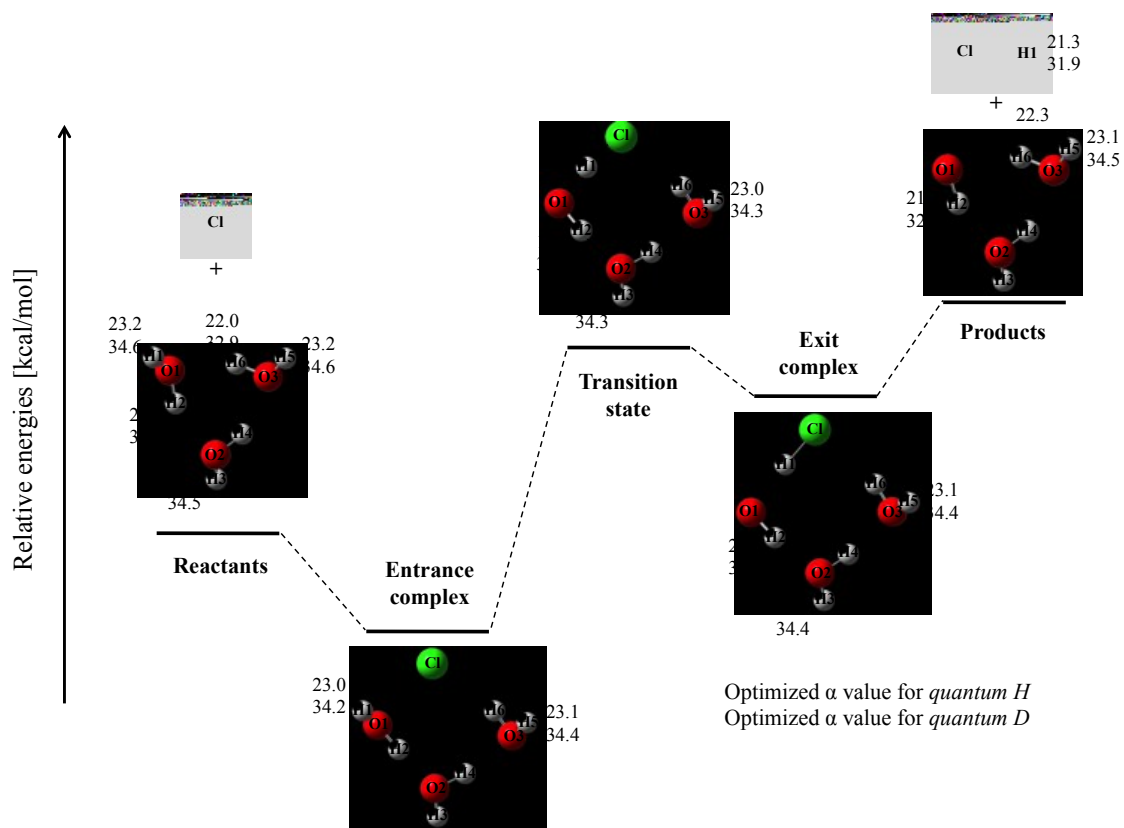

FIGURE S6. The exponent  $\alpha_{\text{opt}}$  value of nuclear basis function obtained by MC $\omega$ B97XD/cc-pVQZ//MC $\omega$ B97XD/cc-pVTZ calculation for  $\text{Cl}\cdot + (\text{H}_2\text{O})_3 \rightarrow \text{HCl} + \text{OH}\cdot(\text{H}_2\text{O})_2$  and  $\text{Cl}\cdot + (\text{D}_2\text{O})_3 \rightarrow \text{DCl} + \text{OD}\cdot(\text{D}_2\text{O})_2$  reaction.

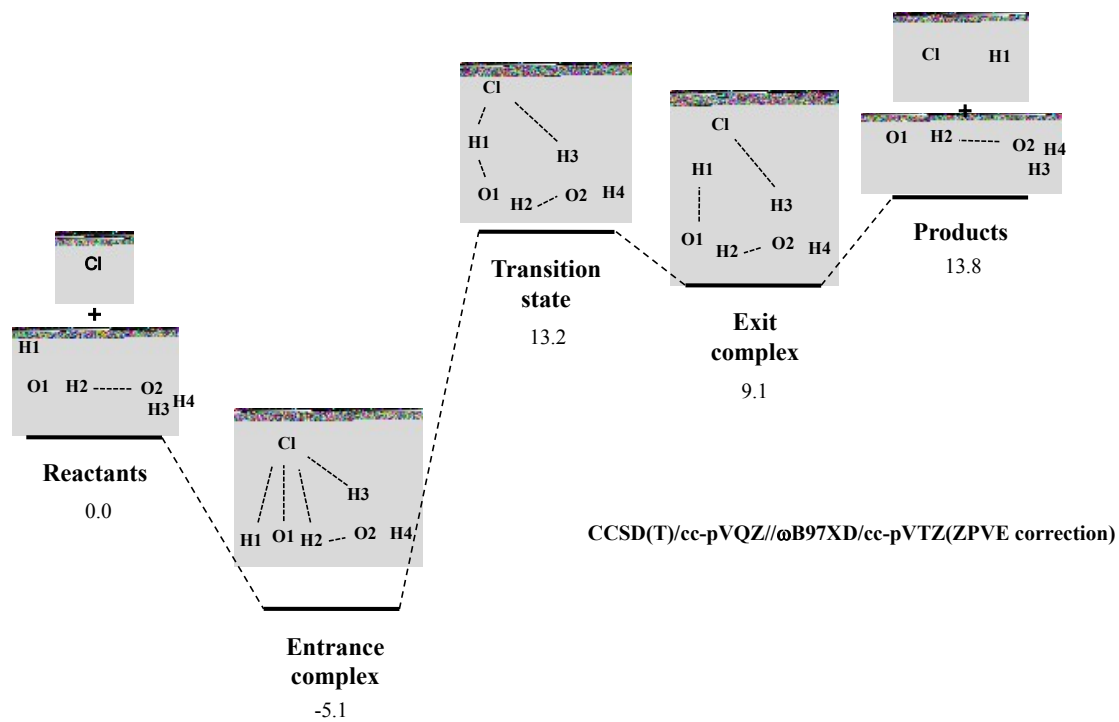

FIGURE S7. The potential energy profile (kcal/mol) and the optimized geometrical parameters ( $\text{\AA}$ ) for  $\text{Cl}\cdot + (\text{H}_2\text{O})_2 \rightarrow \text{HCl} + \text{OH}\cdot(\text{H}_2\text{O})$  reaction obtained by CCSD(T)/cc-pVQZ// $\omega$ B97XD/cc-pVTZ calculations. Relative energies are calculated as the energy difference between the energy of each stationary point structure and sum of energies of Cl radical and  $(\text{H}_2\text{O})_2$  (**Reactants**).

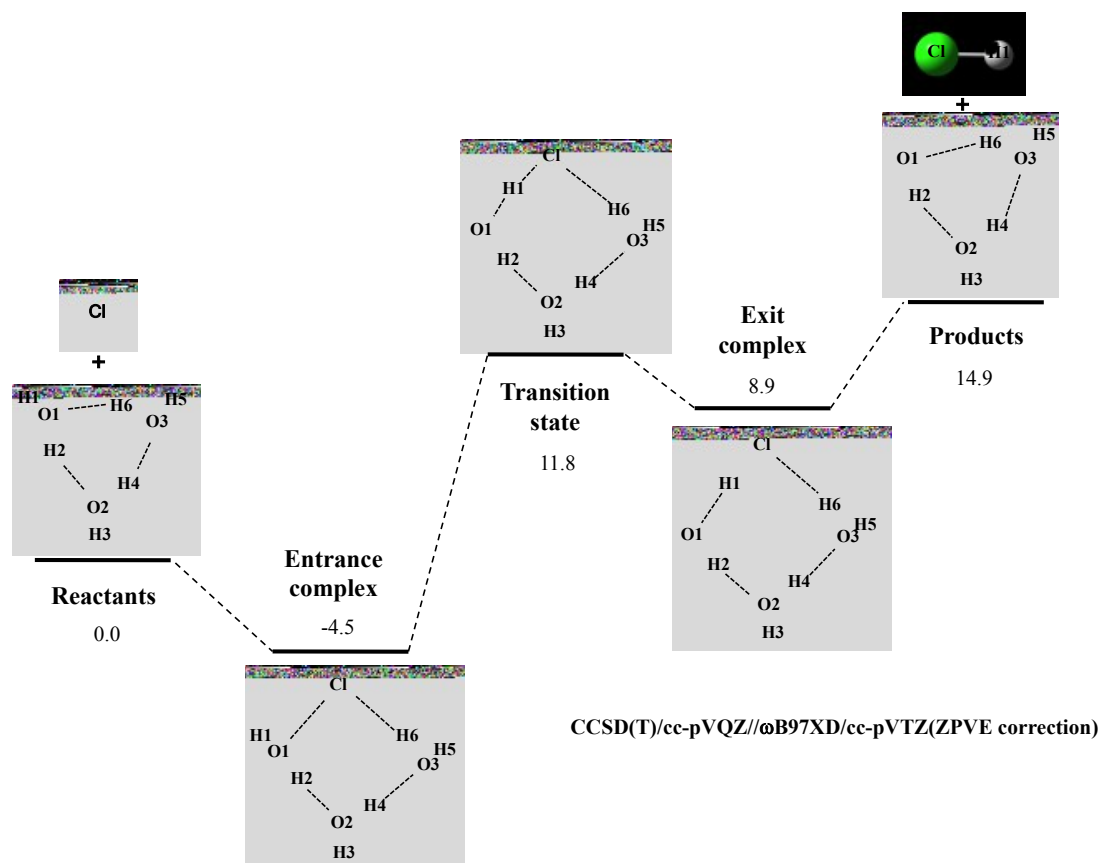

FIGURE S8. The potential energy profile (kcal/mol) and stationary point structures for  $\text{Cl}\cdot + (\text{H}_2\text{O})_3 \rightarrow \text{HCl} + \text{OH}\cdot(\text{H}_2\text{O})_2$  reaction obtained by CCSD(T)/cc-pVQZ// $\omega$ B97XD/cc-pVTZ calculations. Relative energies are calculated as the energy difference between the energy of each stationary point structure and sum of energies of Cl radical and  $(\text{H}_2\text{O})_3$  (**Reactants**).



TABLE S1. Optimized geometrical parameter (Å) of **Reactants** for  $\text{Cl}\cdot + (\text{H}_2\text{O})_2 \rightarrow \text{HCl} + \text{OH}\cdot(\text{H}_2\text{O})$  reaction obtained by DFT/cc-pVTZ methods.

| Method                             | R(O1-H1) | R(O1-H2) | R(O2-H3) | R(O2...H2) |
|------------------------------------|----------|----------|----------|------------|
| <b>B3LYP</b>                       | 0.960    | 0.968    | 0.962    | 1.948      |
| <b>CAM-B3LYP</b>                   | 0.959    | 0.967    | 0.961    | 1.906      |
| <b>M06</b>                         | 0.957    | 0.966    | 0.959    | 1.936      |
| <b><math>\omega</math>B97XD</b>    | 0.956    | 0.965    | 0.958    | 1.936      |
| <b>MPW1K</b>                       | 0.950    | 0.958    | 0.951    | 1.933      |
| <b>CCSD(T)/cc-pVQZ<sup>a</sup></b> | 0.957    | 0.964    | 0.959    | 1.953      |

<sup>a</sup>Ref. 7

TABLE S2. Optimized geometrical parameter (Å) of **Exit complex** for  $\text{Cl}\cdot + (\text{H}_2\text{O})_2 \rightarrow \text{HCl} + \text{OH}\cdot(\text{H}_2\text{O})$  reaction obtained by DFT/cc-pVTZ methods.

| Method                             | R(O1-H2) | R(O2-H3) | R(O2-H4) | R(O1...H1) | R(O2...H2) | R(Cl...H1) | R(Cl...H3) |
|------------------------------------|----------|----------|----------|------------|------------|------------|------------|
| <b>B3LYP</b>                       | 0.994    | 0.967    | 0.962    | 1.818      | 1.788      | 1.318      | 2.649      |
| <b>CAM-B3LYP</b>                   | 0.993    | 0.966    | 0.960    | 1.810      | 1.761      | 1.313      | 2.582      |
| <b>M06</b>                         | 0.989    | 0.965    | 0.958    | 1.877      | 1.809      | 1.311      | 2.514      |
| <b><math>\omega</math>B97XD</b>    | 0.988    | 0.962    | 0.957    | 1.844      | 1.800      | 1.311      | 2.640      |
| <b>MPW1K</b>                       | 0.981    | 0.955    | 0.951    | 1.813      | 1.779      | 1.304      | 2.661      |
| <b>CCSD(T)/cc-pVQZ<sup>a</sup></b> | 0.983    | 0.962    | 0.968    | 1.916      | 1.835      | 1.298      | 2.616      |

<sup>a</sup>Ref. 7

TABLE S3. Optimized geometrical parameter (Å) of **Products** for  $\text{Cl}\cdot + (\text{H}_2\text{O})_2 \rightarrow \text{HCl} + \text{OH}\cdot(\text{H}_2\text{O})$  reaction obtained by DFT/cc-pVTZ methods.

| <b>Method</b>                      | <b>OH·(H<sub>2</sub>O)</b> |          |            | <b>HCl</b> |
|------------------------------------|----------------------------|----------|------------|------------|
|                                    | R(O1-H2)                   | R(O2-H3) | R(O2···H2) | R(Cl-H2)   |
| <b>B3LYP</b>                       | 0.983                      | 0.962    | 1.881      | 1.283      |
| <b>CAM-B3LYP</b>                   | 0.982                      | 0.960    | 1.848      | 1.280      |
| <b>M06</b>                         | 0.980                      | 0.958    | 1.886      | 1.283      |
| <b>ωB97XD</b>                      | 0.979                      | 0.957    | 1.882      | 1.280      |
| <b>MPW1K</b>                       | 0.971                      | 0.951    | 1.871      | 1.273      |
| <b>CCSD(T)/cc-pVQZ<sup>a</sup></b> | 0.976                      | 0.958    | 1.903      | 1.277      |

<sup>a</sup>Ref. 7

TABLE S4. Optimized geometrical parameters (Å) of **Reactants** for  $\text{Cl}\cdot + (\text{H}_2\text{O})_3 \rightarrow \text{HCl} + \text{OH}\cdot(\text{H}_2\text{O})_2$  reaction obtained by DFT/cc-pVTZ methods.

| Method           | R(O1-H1) | R(O1-H2) | R(O2-H3) | R(O2-H4) | R(O3-H5) | R(O3-H6) | R(O1⋯H6) | R(O2⋯H2) | R(O3⋯H4) |
|------------------|----------|----------|----------|----------|----------|----------|----------|----------|----------|
| <b>B3LYP</b>     | 0.961    | 0.977    | 0.961    | 0.977    | 0.961    | 0.977    | 1.894    | 1.877    | 1.876    |
| <b>CAM-B3LYP</b> | 0.959    | 0.977    | 0.959    | 0.977    | 0.959    | 0.976    | 1.856    | 1.841    | 1.837    |
| <b>M06</b>       | 0.957    | 0.974    | 0.957    | 0.974    | 0.957    | 0.974    | 1.891    | 1.882    | 1.876    |
| <b>ωB97XD</b>    | 0.956    | 0.972    | 0.957    | 0.973    | 0.956    | 0.972    | 1.896    | 1.882    | 1.877    |
| <b>MPW1K</b>     | 0.950    | 0.966    | 0.950    | 0.966    | 0.950    | 0.965    | 1.882    | 1.862    | 1.859    |

TABLE S5. Optimized geometrical parameters (Å) of **Entrance complex** for  $\text{Cl}\cdot + (\text{H}_2\text{O})_3 \rightarrow \text{HCl} + \text{OH}\cdot(\text{H}_2\text{O})_2$  reaction obtained by DFT/cc-pVTZ methods.

| Method           | R(O1-H1) | R(O1-H2) | R(O2-H3) | R(O2-H4) | R(O3-H5) | R(O3-H6) | R(O1⋯Cl) | R(O2⋯H2) | R(O3⋯H4) | R(Cl⋯H6) |
|------------------|----------|----------|----------|----------|----------|----------|----------|----------|----------|----------|
| <b>B3LYP</b>     | 0.965    | 1.000    | 0.961    | 0.984    | 0.962    | 0.973    | 2.419    | 1.660    | 1.752    | 2.311    |
| <b>CAM-B3LYP</b> | 0.963    | 0.997    | 0.960    | 0.982    | 0.960    | 0.971    | 2.371    | 1.649    | 1.730    | 2.295    |
| <b>M06</b>       | 0.962    | 0.990    | 0.958    | 0.978    | 0.958    | 0.969    | 2.433    | 1.706    | 1.776    | 2.331    |
| <b>ωB97XD</b>    | 0.960    | 0.991    | 0.957    | 0.978    | 0.957    | 0.968    | 2.386    | 1.676    | 1.761    | 2.313    |
| <b>MPW1K</b>     | 0.953    | 0.984    | 0.951    | 0.971    | 0.951    | 0.961    | 2.356    | 1.664    | 1.749    | 2.320    |

TABLE S6. Optimized geometrical parameters (Å) of **Transition state** for  $\text{Cl}\cdot + (\text{H}_2\text{O})_3 \rightarrow \text{HCl} + \text{OH}\cdot(\text{H}_2\text{O})_2$  reaction obtained by DFT/cc-pVTZ methods.

| Method           | R(O1-H2) | R(O2-H3) | R(O2-H4) | R(O3-H5) | R(O3-H6) | R(O1⋯H1) | R(O2⋯H2) | R(O3⋯H4) | R(Cl⋯H1) | R(Cl⋯H6) |
|------------------|----------|----------|----------|----------|----------|----------|----------|----------|----------|----------|
| <b>B3LYP</b>     | 1.017    | 0.961    | 0.985    | 0.962    | 0.973    | 1.379    | 1.611    | 1.739    | 1.418    | 2.324    |
| <b>CAM-B3LYP</b> | 1.022    | 0.960    | 0.986    | 0.960    | 0.972    | 1.289    | 1.563    | 1.700    | 1.452    | 2.273    |
| <b>M06</b>       | 1.001    | 0.958    | 0.980    | 0.958    | 0.970    | 1.374    | 1.631    | 1.754    | 1.420    | 2.289    |
| <b>ωB97XD</b>    | 1.013    | 0.957    | 0.981    | 0.957    | 0.969    | 1.295    | 1.598    | 1.733    | 1.446    | 2.297    |
| <b>MPW1K</b>     | 1.018    | 0.951    | 0.978    | 0.951    | 0.964    | 1.197    | 1.532    | 1.694    | 1.503    | 2.255    |

TABLE S7. Optimized geometrical parameters (Å) of **Exit complex** for  $\text{Cl}\cdot + (\text{H}_2\text{O})_3 \rightarrow \text{HCl} + \text{OH}\cdot(\text{H}_2\text{O})_2$  reaction obtained by DFT/cc-pVTZ methods.

| Method           | R(O1-H2) | R(O2-H3) | R(O2-H4) | R(O3-H5) | R(O3-H6) | R(Cl-H1) | R(O1⋯H1) | R(O2⋯H2) | R(O3⋯H4) | R(Cl⋯H6) |
|------------------|----------|----------|----------|----------|----------|----------|----------|----------|----------|----------|
| <b>B3LYP</b>     | 1.008    | 0.961    | 0.983    | 0.962    | 0.971    | 1.341    | 1.668    | 1.659    | 1.760    | 2.361    |
| <b>CAM-B3LYP</b> | 1.007    | 0.960    | 0.982    | 0.960    | 0.970    | 1.335    | 1.662    | 1.636    | 1.732    | 2.326    |
| <b>M06</b>       | 0.998    | 0.957    | 0.978    | 0.958    | 0.968    | 1.325    | 1.752    | 1.701    | 1.783    | 2.343    |
| <b>ωB97XD</b>    | 1.000    | 0.957    | 0.977    | 0.958    | 0.966    | 1.332    | 1.690    | 1.671    | 1.764    | 2.343    |
| <b>MPW1K</b>     | 0.994    | 0.950    | 0.971    | 0.951    | 0.960    | 1.326    | 1.661    | 1.652    | 1.751    | 2.350    |

TABLE S8. Optimized geometrical parameters (Å) of **Products** for  $\text{Cl} \cdot + (\text{H}_2\text{O})_3 \rightarrow \text{HCl} + \text{OH} \cdot (\text{H}_2\text{O})_2$  reaction obtained by DFT/cc-pVTZ methods

| <b>Method</b>    | <b>OH·(H<sub>2</sub>O)<sub>2</sub></b> |          |          |          |          |            | <b>HCl</b> |            |          |
|------------------|----------------------------------------|----------|----------|----------|----------|------------|------------|------------|----------|
|                  | R(O1-H2)                               | R(O2-H3) | R(O2-H4) | R(O3-H5) | R(O3-H6) | R(O1···H6) | R(O2···H2) | R(O3···H4) | R(Cl-H1) |
| <b>B3LYP</b>     | 0.994                                  | 0.961    | 0.977    | 0.961    | 0.973    | 2.018      | 1.808      | 1.878      | 1.283    |
| <b>CAM-B3LYP</b> | 0.994                                  | 0.959    | 0.976    | 0.959    | 0.972    | 1.977      | 1.775      | 1.838      | 1.280    |
| <b>M06</b>       | 0.989                                  | 0.957    | 0.973    | 0.957    | 0.970    | 2.006      | 1.822      | 1.877      | 1.283    |
| <b>ωB97XD</b>    | 0.988                                  | 0.957    | 0.972    | 0.957    | 0.968    | 2.032      | 1.817      | 1.881      | 1.280    |
| <b>MPW1K</b>     | 0.980                                  | 0.950    | 0.965    | 0.950    | 0.961    | 2.018      | 1.799      | 1.865      | 1.273    |
